# Supplementary material for: Proanthocyanidins reduce cellular function in the most globally diagnosed cancers in vitro
Source: PeerJ. 2020 Sep 15;8:e9910. doi: 10.7717/peerj.9910 (PMC7500326; doi:10.7717/peerj.9910)
Supplement: Supplemental Information 1 [file peerj-08-9910-s001.xlsx]

## Sheet: MTT assay 
1.Cell viability assay (MTT assay)	HT-29 /24 h								MCF-7 /24h								PC-3 /42h
	Conc	1	2	3	4	5	6		Conc	1	2	3	4	5	6		Conc	1	2	3	4	5	6
	1	0.70412	0.63015	0.63575	0.74525	0.22005	0.85067		1	0.79654	0.72564	0.77036	0.74427	0.80378	0.89315		1	0.85561	0.74629	0.74441	0.79921	0.81371	0.82777
	5	0.59531	0.65563	0.53126	0.67394	0.45787	0.76884		5	0.75725	0.76419	0.72805	0.72512	0.72235	0.60357		5	0.67525	0.74926	0.71372	0.74933	0.73523	0.69093
	10	0.57956	0.55221	0.58023	0.53103	0.56358	0.54818		10	0.69829	0.65243	0.64175	0.67879	0.67454	0.84652		10	0.70493	0.65239	0.66522	0.69065	0.67511	0.65218
	50	0.53342	0.47546	0.50365	0.49525	0.39655	0.64763		50	0.58915	0.64528	0.63528	0.59464	0.59045	0.55204		50	0.54413	0.52933	0.5364	0.57601	0.51377	0.5787
	100	0.3318	0.42325	0.45564	0.41659	0.36653	0.38624		100	0.58324	0.43852	0.49255	0.49413	0.49017	0.49791		100	0.5232	0.50588	0.5961	0.5519	0.51202	0.52009
	200	0.26013	0.15047	0.21436	0.18765	0.16756	0.25532		200	0.25582	0.29907	0.26231	0.28584	0.27234	0.30711		200	0.2415	0.29995	0.28392	0.22054	0.23054	0.3954
	400	0.0978	0.10559	0.13576	0.07983	0.09543	0.26975		400	0.12934	0.09871	0.11534	0.09007	0.12866	0.2967		400	0.12001	0.09411	0.09394	0.11907	0.12116	0.09477
	800	0.03159	0.09352	0.05617	0.04072	0.03589	0.13525		800	0.07954	0.0355	0.06891	0.05168	0.0576	0.04988		800	0.07516	0.03112	0.3459	0.05472	0.03792	0.03554
	HT-29 /48 h								MCF-7/48 h								PC3/48 h
	Conc	1	2	3	4	5	6		Conc	1	2	3	4	5	6		Conc	1	2	3	4	5	6
	1	0.72585	0.67225	0.61752	0.62634	0.72639	0.84125		1	0.79552	0.72154	0.74082	0.73206	0.77018	0.81124		1	0.85504	0.74672	0.74156	0.81223	0.80176	0.79221
	5	0.59587	0.58215	0.51816	0.55672	0.60483	0.54743		5	0.75234	0.71348	0.707214	0.73535	0.74199	0.8422		5	0.63513	0.71668	0.68386	0.66979	0.63724	0.70118
	10	0.51982	0.43127	0.52489	0.43517	0.42925	0.42298		10	0.69943	0.6599	0.67383	0.6689	0.67446	0.71059		10	0.57396	0.52686	0.55032	0.5423	0.56075	0.56049
	50	0.41643	0.48576	0.43614	0.47631	0.43214	0.46547		50	0.58212	0.64175	0.57455	0.5881	0.61045	0.64693		50	0.46027	0.40443	0.45148	0.4191	0.44054	0.40177
	100	0.26978	0.25542	0.23292	0.15765	0.26952	0.15839		100	0.51045	0.43184	0.45023	0.44137	0.49992	0.50907		100	0.42346	0.37589	0.37295	0.41551	0.39514	0.3803
	200	0.13106	0.15854	0.14463	0.15624	0.16141	0.15315		200	0.20628	0.29987	0.2601	0.2474	0.2724	0.2145		200	0.25055	0.31262	0.28024	0.31154	0.27054	0.29976
	400	0.07143	0.13739	0.06919	0.1182	0.06184	0.1604		400	0.12428	0.09984	0.13366	0.11853	0.08949	0.12944		400	0.12524	0.06273	0.09113	0.0903	0.11516	0.7915
	800	0.09501	0.04456	0.03205	0.08925	0.02176	0.03435		800	0.07182	0.0347	0.0363	0.03135	0.02371	0.0657		800	0.09425	0.0283	0.05072	0.02405	0.02038	0.03893
	HT-29 /72 h								MCF-7 /72 h								PC3 /72 h
	Conc	1	2	3	4	5	6		Conc	1	2	3	4	5	6		Conc	1	2	3	4	5	6
	1	0.75425	0.62741	0.65208	0.66225	0.7188	0.90518		1	0.89579	0.85201	0.82117	0.86333	0.89871	0.90161		1	0.85527	0.74671	0.74357	0.73018	0.81934	0.79006
	5	0.53195	0.57549	0.51692	0.52488	0.58062	0.55762		5	0.53282	0.68008	0.67106	0.6908	0.55257	0.56185		5	0.52529	0.592016	0.5575	0.56119	0.54823	0.52375
	10	0.38919	0.45943	0.45346	0.39934	0.49217	0.45427		10	0.59947	0.52763	0.53422	0.57495	0.58123	0.57492		10	0.34069	0.39103	0.35381	0.38078	0.36046	0.37928
	50	0.23678	0.14372	0.13246	0.16327	0.22649	0.12845		50	0.41117	0.47478	0.41122	0.42344	0.43197	0.46005		50	0.40146	0.34041	0.36235	0.38756	0.35276	0.39759
	100	0.23132	0.14575	0.24753	0.22064	0.19254	0.17816		100	0.36423	0.3257	0.34055	0.33114	0.35107	0.37224		100	0.31368	0.35545	0.33565	0.35345	0.32801	0.3481
	200	0.17481	0.12054	0.99223	0.11364	0.11436	0.10663		200	0.20108	0.25561	0.23481	0.22143	0.26299	0.29189		200	0.19933	0.24718	0.21063	0.23063	0.19126	0.21064
	400	0.09215	0.06306	0.07056	0.06253	0.08843	0.09451		400	0.05414	0.10921	0.07449	0.09852	0.09708	0.10476		400	0.11603	0.07691	0.14801	0.07058	0.07596	0.9482
	800	0.03756	0.05282	0.02525	0.04257	0.05925	0.02182		800	0.16058	0.0394	0.06964	0.03297	0.0962	0.03262		800	0.09481	0.02143	0.0243	0.03187	0.0229	0.07412
2.Cell proliferation	HT29
	Column1	Column2	Column3	Column4	Column5	Column6	Column7	Column8	Column9	Column10	Column11	Column12	Column13	Column14	Column15	Column16	Column17	Column172	Column17
		Control	Control	Control	5 g/ml	5 g/ml	5 g/ml	10 g/ml	10 g/ml	10 g/ml	50 g/ml	50 g/ml	50 g/ml	100 g/ml	100 g/ml	100 g/ml	200 g/ml	200 g/ml	200 g/ml
	0 h	21	18	17	22	16	18	19	14	17	25	15	17	21	15	20	22	20	19
	24 h	40	45	44	38	41	39	26	30	29	25	21	24	23	19	22	10	9	8
	48 h	80	87	85	69	60	65	55	40	46	29	24	28	23	20	21	15	19	10
	72 h	96	100	99	77	80	79	58	63	60	35	25	32	25	19	23	16	5	7
	MCF7
	Time	Column2	Column3	Column1	Column4	Column5	Column12	Column6	Column7	Column13	Column8	Column9	Column14	Column10	Column11	Column15	Column122	Column122	Column122
		Control	Control	Control	5 g/ml	5 g/ml	5 g/ml	10 g/ml	10 g/ml	10 g/ml	50 g/ml	50 g/ml	50 g/ml	100 g/ml	100 g/ml	100 g/ml	200 g/ml	200 g/ml	200 g/ml
	0 h	20	14	15	23	14	21	25	10	17	26	15	17	22	16	18	19	18	21
	24 h	50	60	55	48	55	54	26	30	28	25	21	23	27	19	25	10	21	15
	48 h	80	90	83	61	70	64	58	43	54	29	24	25	20	23	22	19	10	14
	72 h	96	100	79	60	74	71	50	43	49	35	20	31	19	21	18	15	8	9
	PC3
	Time	Column2	Column3	Column1	Column4	Column5	Column12	Column6	Column7	Column13	Column8	Column9	Column14	Column10	Column11	Column15	Column122	Column1222	Column1223
		Control	Control	Control	5 g/ml	5 g/ml	5 g/ml	10 g/ml	10 g/ml	10 g/ml	50 g/ml	50 g/ml	50 g/ml	100 g/ml	100 g/ml	100 g/ml	200 g/ml	200 g/ml	200 g/ml
	0 h	22	16	19	21	16	20	19	17	16	20	17	19	23	17	20	19	17	18
	24 h	55	60	57	40	49	45	38	32	35	25	21	23	20	15	17	12	18	14
	48 h	80	90	86	54	63	62	42	51	46	30	22	25	23	20	21	19	10	12
	72 h	95	100	99	74	85	70	64	75	71	20	14	17	12	5	8	16	3	5
3-Wound healing assay	HT29										MCF7										PC3
	Column1	Control	Column2	Column3	Column4	PACs	Column32	Column33	Column34		Column1	Control	Column2	Column3	Column4	PACs	Column32	Column33	Column34		Column1	Control	Column2	Column3	Column4	PACs	Column32	Column33	Column34
		Control	Control	Control	Control	PACs	PACs	PACs	PACs			Control	Control	Control	Control	PACs	PACs	PACs	PACs			Control	Control	Control	Control	PACs	PACs	PACs	PACs
	0 h	7	3	2	0	6	1	2	0		0 h	8	2	1	4	5	1	3	2		0 h	6	2	3	0	5	2	1	2
	24 hrs	65	75	71	63	15	20	16	18		24 hrs	50	67	57	66	15	20	17	16		24 hrs	60	70	65	69	20	15	17	19
	48 hrs	98	100	99	98	20	14	16	19		48 hrs	98	88	89	94	20	14	15	18		48 hrs	93	100	95	97	30	15	26	18
4-Apoptotic nucleus morphology study	HT29			MCF7			PC3
	Control	PACs		Control	PACs		Control	PACs
	20	74		17	68		19	70
	18	79		23	62		27	68
	27	72		18	66		21	72
	33	81		20	67		26	66
	19	75		21	61		23	69
	31	78		24	67		25	69
	128	459		123	391		141	414
	21.3333	76.5		20.5	65.1667		23.5	69
5-Reverse transcription-polymerase chain reaction (RT-PCR)	HT-29-3 rna BCL2			HT-29-3 rna BAX			MCF7rna BCL2			MCF7 rna BAX			PC3 rna BCL2			PC3rna BAX
	Control	PACs		Control	PACs		Control	PACs		Control	PACs		Control	PACs		Control	PACs
	0.916	1.4		0.803	0.51		1	0.674		0.997	1.532		1.31	0.5		0.903	1.88
	0.867	1.37		0.852	0.57		0.92	0.6		0.793	1.74		0.925	0.59		0.991	1.74
	0.851	1.39		0.827	0.55		0.99	0.745		0.965	1.69		1.13	0.576		1.163	1.87
	0.873	1.54		0.839	0.58		0.93	0.63		0.912	1.421		0.745	0.569		0.896	1.82
	0.849	1.39		0.844	0.52		0.95	0.68		0.871	1.856		0.74	0.61		0.739	1.79
	0.921	1.38		0.867	0.56		0.98	0.511		1.13	1.627		0.85	0.44		0.967	1.76
	5.277	8.47		5.032	3.29		5.77	3.84		5.668	9.866		5.7	3.285		5.659	10.86
	0.8795	1.41167		0.838667	0.548333		0.961667	0.64		0.944667	1.64433		0.95	0.5475		0.943167	1.81
6-Caspase (3,8 and 9) enzyme activity assay	HT29	C3		HT29	C8		HT29	C9		MCF7	C3		MCF7	C8		MCF7	C9		PC3	C3		PC3	C8		PC3	C9
	Control	PACs		Control	PACs		Control	PACs		Control	PACs		Control	PACs		Control	PACs		Control	PACs		Control	PACs		Control	PACs
	100	160		100	120		99.85	130		100	118		99.79	162		100	144		100	120		100	125		99.85	107
	100	161		100	119		100	131		100	123		99.99	145		99.67	140		100	109		100	110		100	125
	100	157		100	115		100	129		100	121		100	158		99.99	142		100	115		100	126		100	120
	100	150		99.99	117		100	130		99.9	119		100	143		100	146		100	111		100	129		100	119
	99.9	159		100	119		100	132		99.9	120		100	160		100	137		100	118		99.99	132		100	135
	99.8	162		100	116		100	128		99.87	122		100	166		100	148		99.85	106		99.98	114		100	126
	599.7	949		599.99	706		599.85	780		599.67	723		599.78	934		599.66	857		599.85	679		599.97	736		599.85	732
	99.95	158.167		99.9983	117.667		99.975	130		99.945	120.5		99.9633	155.667		99.9433	142.833		99.975	113.167		99.995	122.667		99.975	122
